# Supplementary material
Source: PubMed Central journal article supplement (PMC4752127)
Supplement: NIHMS712161-supplement-01.pdf [file NIHMS712161-supplement-01.pdf]

**Supplementary Table 1.** Comparison between those lost to follow-up (n=828)<sup>a</sup>, and those who completed wave 6 (n=333)

|                                    | Lost to follow-up (n=828) |      | Completed wave 6 (n=333) |      | P-value |
|------------------------------------|---------------------------|------|--------------------------|------|---------|
|                                    | M or %                    | SD   | M or %                   | SD   |         |
| Age at baseline, years             | 43.4                      | 15.2 | 42.4                     | 13.3 | 0.32    |
| Education, years                   | 14.0                      | 2.9  | 14.6                     | 2.5  | 0.001   |
| Gender, % female                   | 48.1                      |      | 48.9                     |      | 0.79    |
| Race, % African American           | 5.1                       |      | 2.7                      |      | 0.07    |
| Body mass index, kg/m <sup>2</sup> | 28.6                      | 5.9  | 28.2                     | 5.3  | 0.45    |
| Systolic BP, mmHg                  | 146.5                     | 29.9 | 140.0                    | 25.1 | <0.001  |
| Diastolic BP, mmHg                 | 90.0                      | 17.0 | 88.8                     | 15.8 | 0.05    |
| WAIS Total                         | 125.4                     | 23.1 | 132.6                    | 20.6 | <0.001  |
| WAIS Verbal                        | 71.8                      | 14.3 | 75.0                     | 12.8 | <0.001  |

a. n=828 includes n=792 that did not return for follow-up assessment, plus n=36 that returned but were excluded; BP, blood pressure; WAIS, Wechsler Adult Intelligence Scale.
